# Supplementary material for: Effect of TiO2 Film Thickness on the Stability of Au9 Clusters with a CrOx Layer
Source: MDPI journal article supplement (doi:10.3390/nano12183218), 2022-09-16
Supplement: s1 [file s1]

## Supporting Information for:

### Effect of TiO<sub>2</sub> Film Thickness on the Stability of Au<sub>9</sub> Clusters with a CrO<sub>x</sub> layer

Abdulrahman S. Alotabi<sup>1,2,3</sup>, Yanting Yin<sup>1,3</sup>, Ahmad Redaa<sup>4,5</sup>, Siriluck Tesana<sup>6,7</sup>,

Gregory F. Metha<sup>8,\*</sup> and Gunther G. Andersson<sup>1,3,\*</sup>

<sup>1</sup> Flinders Institute for Nanoscale Science and Technology, Flinders University, Adelaide, South Australia 5042, Australia

<sup>2</sup> Department of Physics, Faculty of Science and Arts in Baljurashi, Albaha University, Baljurashi 65655, Saudi Arabia

<sup>3</sup> Flinders Microscopy and Microanalysis, College of Science and Engineering, Flinders University, Adelaide, South Australia 5042, Australia

<sup>4</sup> Department of Earth Sciences, University of Adelaide, Adelaide, South Australia 5005, Australia

<sup>5</sup> Faculty of Earth Sciences, King Abdulaziz University, Jeddah, Saudi Arabia

<sup>6</sup> The MacDiarmid Institute for Advanced Materials and Nanotechnology, School of Physical and Chemical Sciences, University of Canterbury, Christchurch 8041, New Zealand

<sup>7</sup> National Isotope Centre, GNS Science, Lower Hutt 5010, New Zealand

<sup>8</sup> Department of Chemistry, University of Adelaide, Adelaide, South Australia 5005, Australia

**\* Corresponding authors:** Gunther G. Andersson, Gregory F. Metha

Email: [gunther.andersson@flinders.edu.au](mailto:gunther.andersson@flinders.edu.au), [greg.metha@adelaide.edu.au](mailto:greg.metha@adelaide.edu.au).

Address: Physical Sciences Building (2111) GPO Box 2100, Adelaide 5001, South Australia

This supporting information document contains detailed descriptions about each of the applied characterization techniques, and also presents the following additional figures and tables:

**Figure S1:** A photo of the  $\text{TiO}_2\text{P}$  (left) and  $\text{TiO}_2\text{G}$  (right) films.

**Figure S2:** UV-Vis spectrum of  $\text{Au}_9(\text{PPh}_3)_8(\text{NO}_3)_3$  in Methanol.

**Figure S3:** Cross-section SEM-EDAX elemental maps of Ti, O and Si of  $\text{TiO}_2\text{P}$  and  $\text{TiO}_2\text{G}$ . Note that the scale bars are different.

**Figure S4:** 3D Profile of (A)  $\text{TiO}_2\text{P}$  before heating, (B)  $\text{TiO}_2\text{P}$  after heating, (C) before heating,  $\text{TiO}_2\text{G}$  and (D)  $\text{TiO}_2\text{G}$  after heating (area  $16 \times 16 \mu\text{m}$ ).

**Figure S5:** Surface morphology with the average of  $R_a$  and  $R_q$  values of (A)  $\text{TiO}_2\text{P}$  before heating, (B)  $\text{TiO}_2\text{P}$  after heating, (C) before heating,  $\text{TiO}_2\text{G}$  and (D)  $\text{TiO}_2\text{G}$  after heating. (area  $595 \times 595 \mu\text{m}$ ). It is important to know that the scale bars are different.

**Figure S6:** XP spectra of Au 4f of (A)  $\text{TiO}_2\text{P-Au}_9$ : after  $\text{Au}_9$  deposition (blue) and after heating (grey) (B)  $\text{TiO}_2\text{P-Au}_9\text{-CrO}_x$ : after  $\text{Au}_9$  deposition (blue), after  $\text{CrO}_x$  layer photodeposited (orange) and after heating (grey).

**Figure S7:** XP spectra of Au 4f of (A)  $\text{TiO}_2\text{G-Au}_9$ : after  $\text{Au}_9$  deposition (blue) and after heating (grey) (B)  $\text{TiO}_2\text{G-Au}_9\text{-CrO}_x$ : after  $\text{Au}_9$  deposition (blue), after  $\text{CrO}_x$  layer photodeposited (orange) and after heating (grey)

**Figure S8:** XP spectra of P 2p of (A)  $\text{TiO}_2\text{P-Au}_9$ : after  $\text{Au}_9$  deposition (blue) and after heating (grey) (B)  $\text{TiO}_2\text{P-Au}_9\text{-CrO}_x$ : after  $\text{Au}_9$  deposition (blue), after  $\text{CrO}_x$  layer photodeposited (orange), and after heating (grey)

**Figure S9:** XP spectra of Cr 2p of the  $\text{TiO}_2\text{P-Au}_9\text{-CrO}_x$  sample of (A) 0.006mM sample, (B) 0.06mM sample and (C) 0.6mM sample: after  $\text{CrO}_x$  layer photodeposited (orange) and after heating (grey).

**Figure S10:** XP spectra of P 2p of (A)  $\text{TiO}_2\text{G-Au}_9$ : after  $\text{Au}_9$  deposition (blue) and after heating (grey) (B)  $\text{TiO}_2\text{G-Au}_9\text{-CrO}_x$ : after  $\text{Au}_9$  deposition (blue), after  $\text{CrO}_x$  layer photodeposited (orange), and after heating (grey)

**Figure S11:** XP spectra of Cr 2p of the  $\text{TiO}_2\text{G-Au}_9\text{-CrO}_x$  sample of (A) 0.006mM sample, (B) 0.06mM sample and (C) 0.6mM sample: after  $\text{CrO}_x$  layer photodeposited (orange) and after heating (grey).

**Table S1:** XPS Au 4f<sub>7/2</sub> peak positions and FWHM of  $\text{TiO}_2\text{P-Au}_9$  and  $\text{TiO}_2\text{P-Au}_9\text{-CrO}_x$ .

**Table S2:** XPS Au 4f<sub>7/2</sub> peak positions and FWHM of  $\text{TiO}_2\text{G-Au}_9$  and  $\text{TiO}_2\text{G-Au}_9\text{-CrO}_x$ .

**Table S3:** XPS Cr 2p<sub>3/2</sub> peak positions and FWHM of  $\text{TiO}_2\text{P}$ .

**Table S4:** XPS Cr 2p<sub>3/2</sub> peak positions and FWHM of  $\text{TiO}_2\text{G}$ .

**Table S5:** XPS relative amount of Cr 2p<sub>3/2</sub> to Ti 2p<sub>3/2</sub> of  $\text{TiO}_2\text{P-Au}_9\text{-CrO}_x$  and  $\text{TiO}_2\text{G-Au}_9\text{-CrO}_x$ .

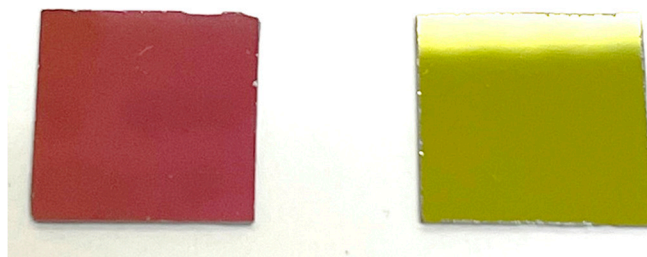

**Figure S1:** A photo of the  $\text{TiO}_2\text{P}$  (left) and  $\text{TiO}_2\text{G}$  (right) films.

Figure S2 shows the UV-Vis spectrum of synthesized  $\text{Au}_9(\text{PPh}_3)_8(\text{NO}_3)_3$  clusters with four peaks around 315, 350, 375 and 440 nm. The UV-Vis spectrum is in agreement with those obtained from literatures of  $\text{Au}_9(\text{PPh}_3)_8(\text{NO}_3)_3$ , confirming the synthesis of  $\text{Au}_9$  clusters[1,2].

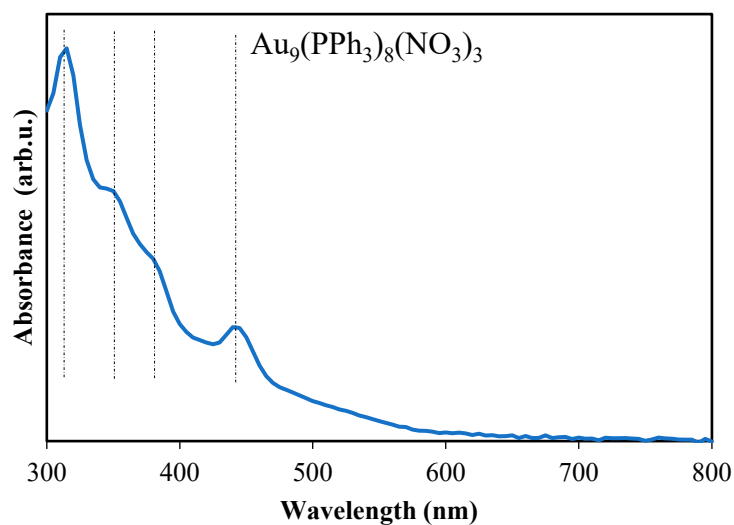

**Figure S2:** UV-Vis spectrum of  $\text{Au}_9(\text{PPh}_3)_8(\text{NO}_3)_3$  in Methanol.

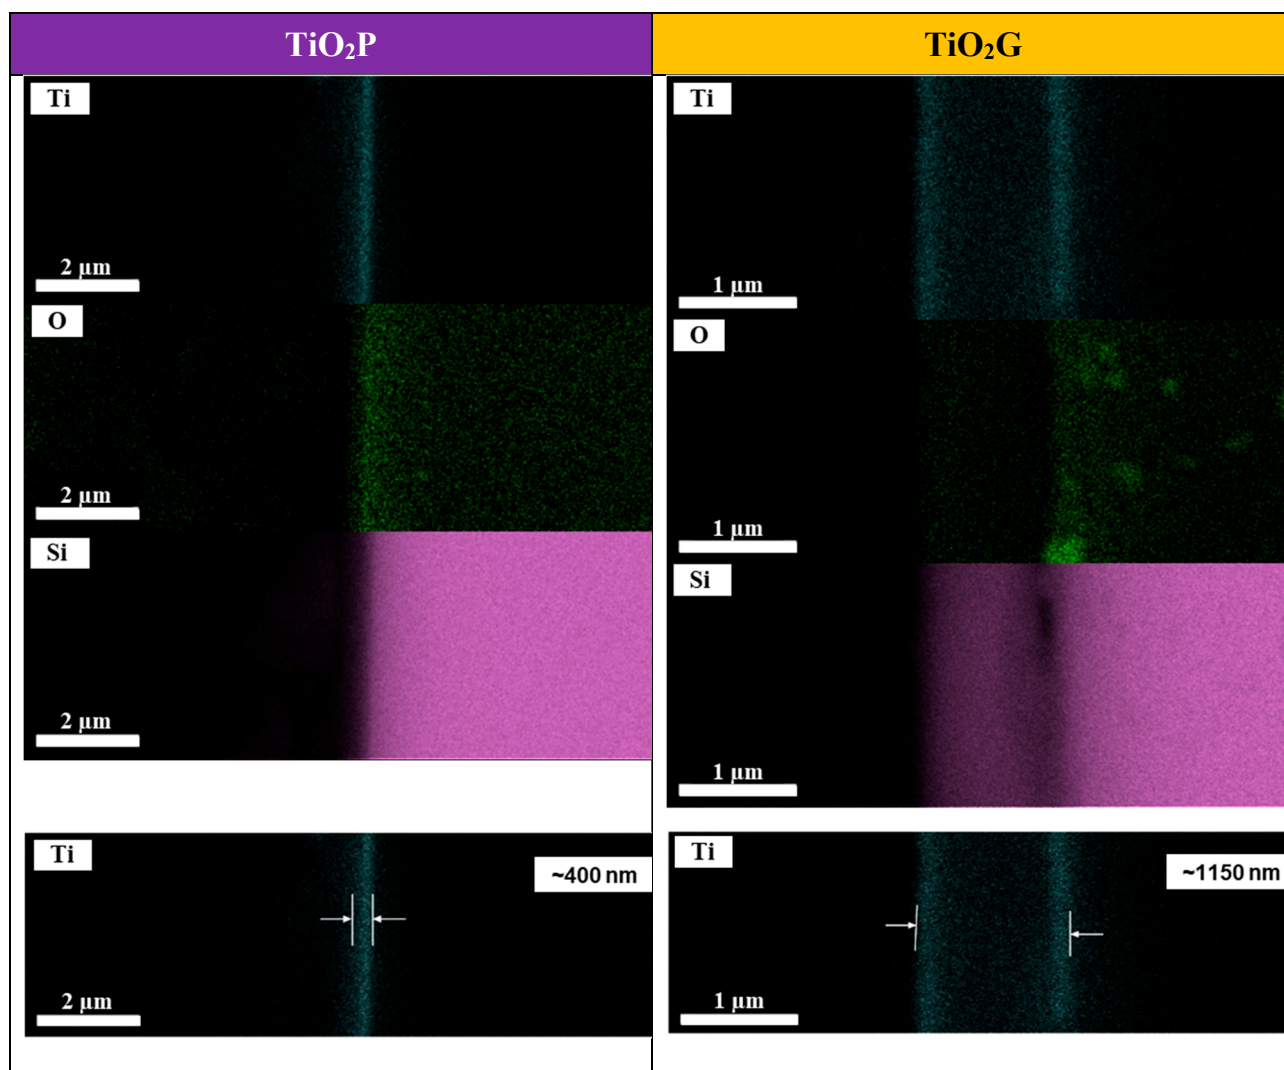

**Figure S3:** Cross-section SEM-EDAX elemental maps of Ti, O and Si of TiO<sub>2</sub>P and TiO<sub>2</sub>G. Note that the scale bars are different.

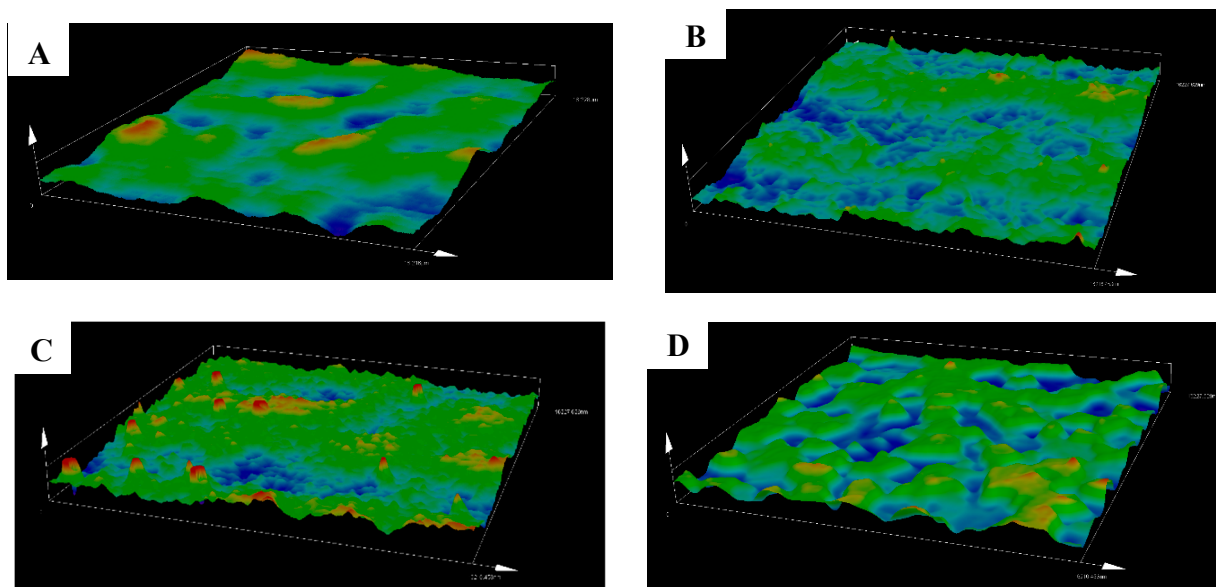

**Figure S4:** 3D Profile of (A)  $\text{TiO}_2\text{P}$  before heating, (B)  $\text{TiO}_2\text{P}$  after heating, (C) before heating,  $\text{TiO}_2\text{G}$  and (D)  $\text{TiO}_2\text{G}$  after heating (area  $16 \times 16 \mu\text{m}$ ).

Figure S5 shows the average Ra and Rq values with a large area scan  $595 \times 595 \mu\text{m}$  of  $\text{TiO}_2\text{P}$  and  $\text{TiO}_2\text{G}$  before and after heating. For  $\text{TiO}_2\text{P}$  before heating, the Ra and Rq values are 1.4 nm and 1.8 nm, while after heating are 1.6 nm and 2.1 nm. For  $\text{TiO}_2\text{G}$  before heating, the Ra and Rq values are 2.8 nm and 4.6 nm, while after heating are 15.0 nm and 17.4 nm. The change in the Ra and Rq values after heating are 0.2 nm and 0.3 nm. for the thin  $\text{TiO}_2$  layer ( $\text{TiO}_2\text{P}$ ), however, the thick  $\text{TiO}_2$  layer ( $\text{TiO}_2\text{G}$ ) are 12.2 nm and 12.8 nm. The Ra and Rq values of  $\text{TiO}_2\text{G}$  after heating are 12 times higher compared to before heating. The change in the surface morphology of  $\text{TiO}_2$  films after heating is due to the transformation of  $\text{TiO}_2$  films from amorphous to anatase[3-5]. Çörekçi et al, showed that the change in the surface morphology of  $\text{TiO}_2$  film is higher for the thicker film than a thin film after heating. This due to the high mobility (recrystallisation) of the thicker film during the thermal heating[4]. Here, the significant change in the morphology of  $\text{TiO}_2\text{G}$  after heating is due to the high mobility of  $\text{TiO}_2\text{G}$  during heating, which is affected by the transformation to anatase phase.



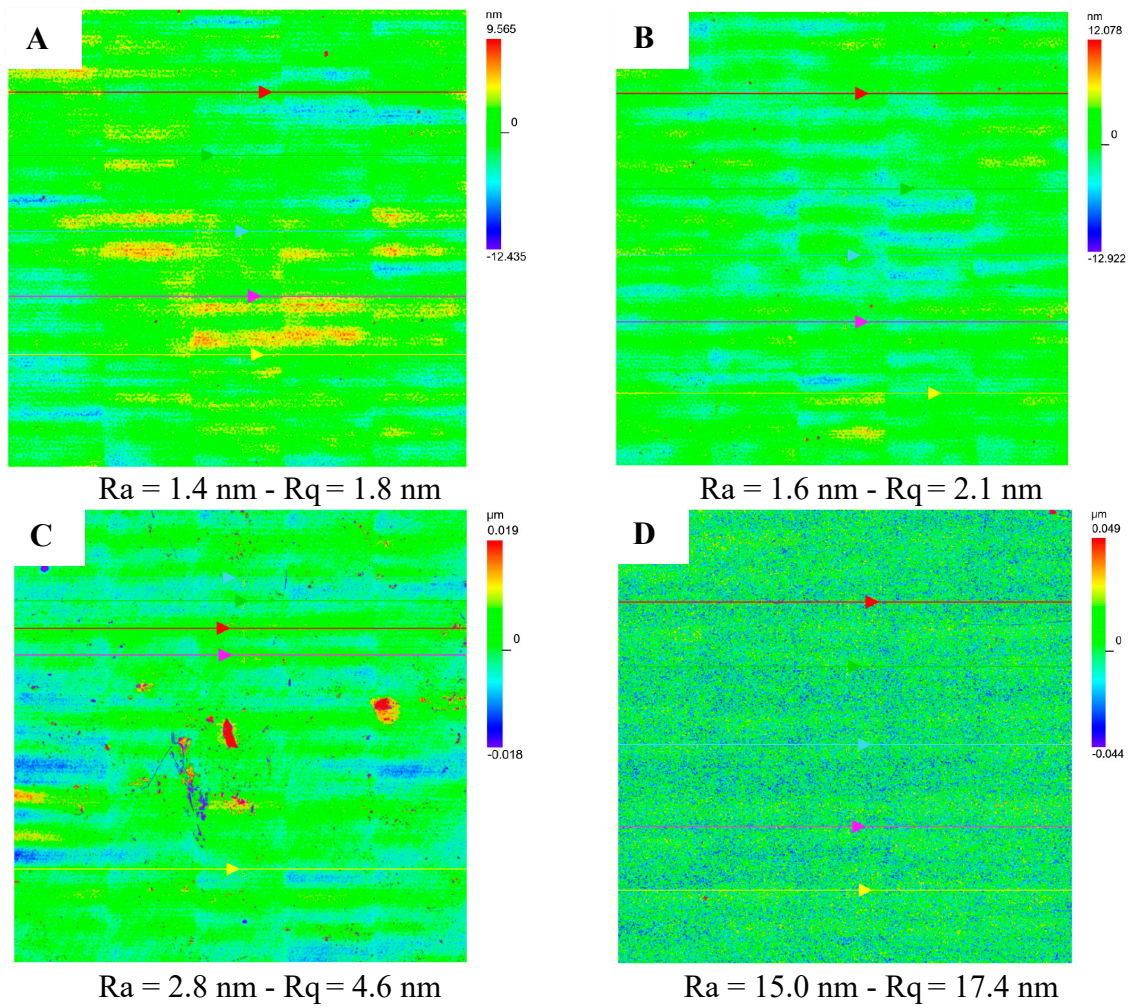

**Figure S5:** Surface morphology with the average of  $R_a$  and  $R_q$  values of (A)  $\text{TiO}_2\text{P}$  before heating, (B)  $\text{TiO}_2\text{P}$  after heating, (C) before heating,  $\text{TiO}_2\text{G}$  and (D)  $\text{TiO}_2\text{G}$  after heating. (area  $595 \times 595 \mu\text{m}$ ). It is important to know that the scale bars are different.

**Table S1:** XPS Au  $4f_{7/2}$  peak positions and FWHM of  $\text{TiO}_2\text{P-Au}_9$  and  $\text{TiO}_2\text{P-Au}_9\text{-CrO}_x$ .

| Au <sub>9</sub><br>concentration | Before heating        |           | After CrO <sub>x</sub> photodeposition |           | After heating         |           |
|----------------------------------|-----------------------|-----------|----------------------------------------|-----------|-----------------------|-----------|
|                                  | Peak position<br>(eV) | FWHM      | Peak position<br>(eV)                  | FWHM      | Peak position<br>(eV) | FWHM      |
| Without CrO <sub>x</sub> layer   |                       |           |                                        |           |                       |           |
| 0.006 mM                         | 85.1 ± 0.2            | 1.7 ± 0.2 | -                                      | -         | 84.8 ± 0.2            | 1.5 ± 0.2 |
| 0.06 mM                          | 85.4 ± 0.2            | 1.7 ± 0.2 | -                                      | -         | 84.8 ± 0.2            | 1.6 ± 0.2 |
| 0.6 mM                           | 85.1 ± 0.2            | 1.8 ± 0.2 | -                                      | -         | 84.7 ± 0.2            | 1.6 ± 0.2 |
| With CrO <sub>x</sub> layer      |                       |           |                                        |           |                       |           |
| 0.006 mM                         | 85.2 ± 0.2            | 1.8 ± 0.2 | 85.3 ± 0.2                             | 1.6 ± 0.2 | 85.0 ± 0.2            | 1.7 ± 0.2 |
| 0.06 mM                          | 85.1 ± 0.2            | 1.8 ± 0.2 | 85.3 ± 0.2                             | 1.6 ± 0.2 | 85.0 ± 0.2            | 1.7 ± 0.2 |
| 0.6 mM                           | 85.1 ± 0.2            | 1.8 ± 0.2 | 85.3 ± 0.2                             | 1.6 ± 0.2 | 85.0 ± 0.2            | 1.7 ± 0.2 |

**Table S2:** XPS Au 4f<sub>7/2</sub> peak positions and FWHM of TiO<sub>2</sub>G-Au<sub>9</sub> and TiO<sub>2</sub>G-Au<sub>9</sub>-CrO<sub>x</sub>.

| Au <sub>9</sub><br>concentration | Before heating        |           | After CrO <sub>x</sub> photodeposition |           | After heating         |           |
|----------------------------------|-----------------------|-----------|----------------------------------------|-----------|-----------------------|-----------|
|                                  | Peak position<br>(eV) | FWHM      | Peak position<br>(eV)                  | FWHM      | Peak position<br>(eV) | FWHM      |
| Without CrO <sub>x</sub> layer   |                       |           |                                        |           |                       |           |
| 0.006 mM                         | 85.4 ± 0.2            | 1.8 ± 0.2 | -                                      | -         | 84.9 ± 0.2            | 1.7 ± 0.2 |
| 0.06 mM                          | 85.4 ± 0.2            | 1.8 ± 0.2 | -                                      | -         | 84.6 ± 0.2            | 1.6 ± 0.2 |
| 0.6 mM                           | 85.3 ± 0.2            | 1.8 ± 0.2 | -                                      | -         | 84.6 ± 0.2            | 1.5 ± 0.2 |
| With CrO <sub>x</sub> layer      |                       |           |                                        |           |                       |           |
| 0.006 mM                         | 85.3 ± 0.2            | 1.6 ± 0.2 | 85.5 ± 0.2                             | 1.6 ± 0.2 | 84.8 ± 0.2            | 1.8 ± 0.2 |
| 0.06 mM                          | 85.2 ± 0.2            | 1.6 ± 0.2 | 85.5 ± 0.2                             | 1.6 ± 0.2 | 84.4 ± 0.2            | 1.6 ± 0.2 |
| 0.6 mM                           | 84.9 ± 0.2            | 1.8 ± 0.2 | 85.3 ± 0.2                             | 1.6 ± 0.2 | 84.3 ± 0.2            | 1.3 ± 0.2 |

Figure S6 shows the Au 4f spectra of TiO<sub>2</sub>P-Au<sub>9</sub> and TiO<sub>2</sub>P-Au<sub>9</sub>-CrO<sub>x</sub>. The blue line is after the Au<sub>9</sub> cluster deposition, orange line is after the photodeposition of CrO<sub>x</sub> layer and grey line is after heating at 200°C for 10min to remove the Au<sub>9</sub> clusters ligands. The black lines indicate the binding energy at 85 eV.

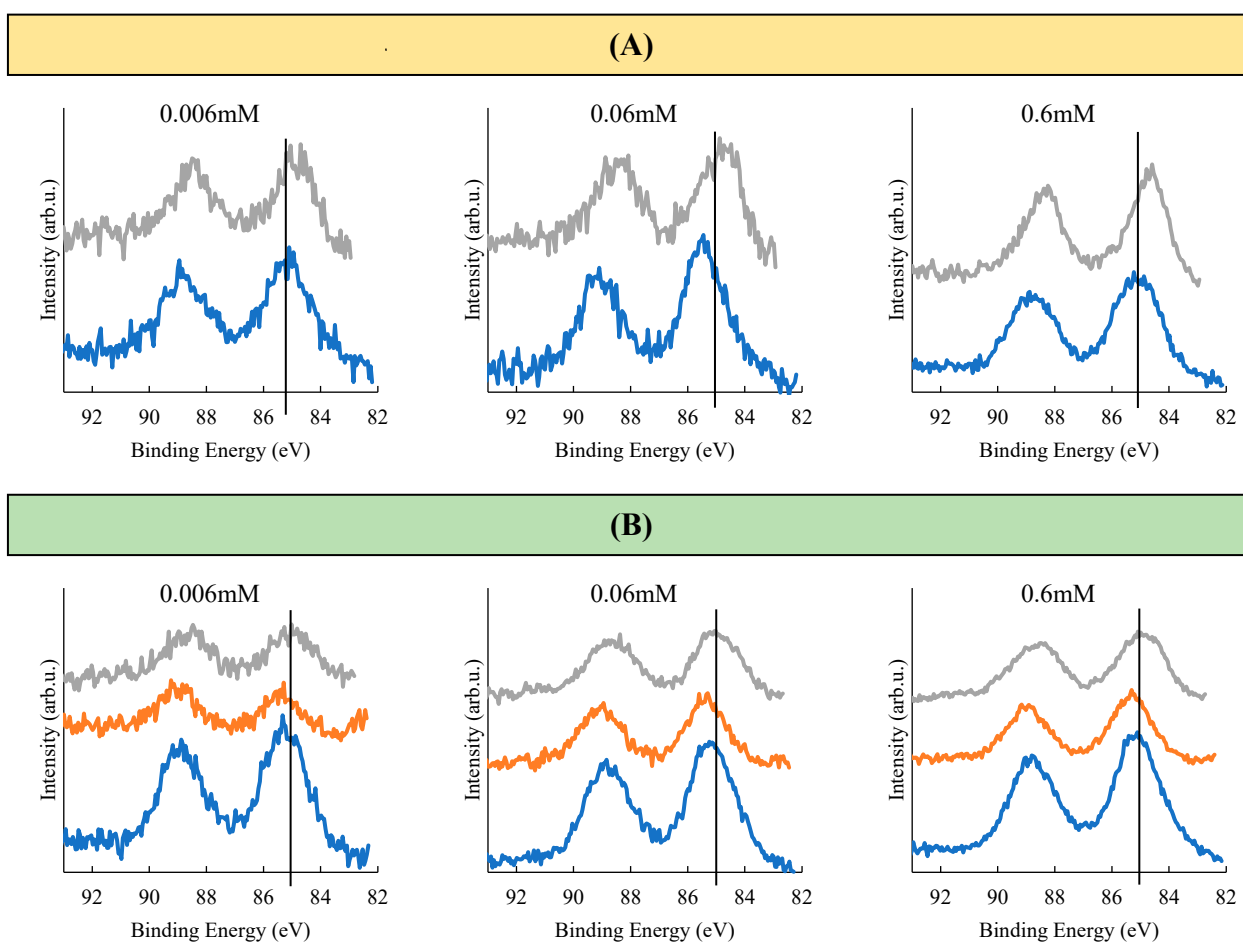

**Figure S6:** XP spectra of Au 4f of (A)  $\text{TiO}_2\text{P-Au}_9$ : after  $\text{Au}_9$  deposition (blue) and after heating (grey) (B)  $\text{TiO}_2\text{P-Au}_9\text{-CrO}_x$ : after  $\text{Au}_9$  deposition (blue), after  $\text{CrO}_x$  layer photodeposited (orange) and after heating (grey).

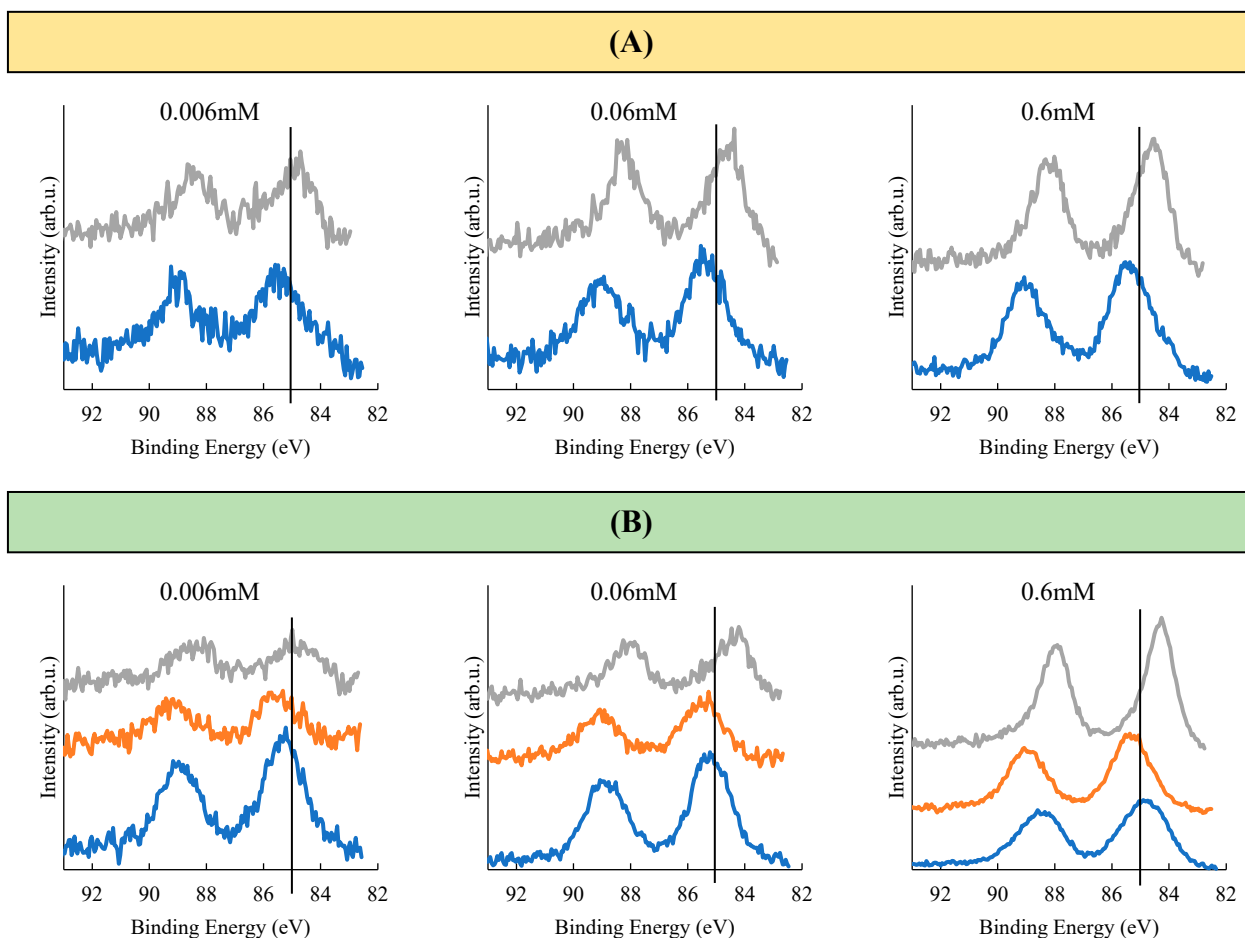

**Figure S7:** XP spectra of Au 4f of (A)  $\text{TiO}_2\text{G-Au}_9$ : after  $\text{Au}_9$  deposition (blue) and after heating (grey) (B)  $\text{TiO}_2\text{G-Au}_9\text{-CrO}_x$ : after  $\text{Au}_9$  deposition (blue), after  $\text{CrO}_x$  layer photodeposited (orange) and after heating (grey)

Figure S8 shows the P 2p spectra of  $\text{TiO}_2\text{P-Au}_9$  and  $\text{TiO}_2\text{P-Au}_9\text{-CrO}_x$ . The blue line is after the  $\text{Au}_9$  cluster deposition, orange line is after the photodeposition of  $\text{CrO}_x$  layer and grey line is after heating. The black lines indicate the position of triphenylphosphine ligands at 131.8 eV[6,7]. The P 2p spectrum can be fitted with doublet ( $2p_{3/2}$  and  $2p_{1/2}$ ), the splitting was fixed at 0.84 eV. Before heating, for 0.6 mM, the P  $2p_{3/2}$  peak is appeared at  $131.8 \pm 0.2$  eV, which relates to the peak position of  $\text{PPh}_3$  ligands bounds to  $\text{Au}_9$  clusters[6,7]. After heating, no peak is detected, indicating that phosphorous ligands were removed by heating for 0.6 mM. For the lower concentrations of 0.06 and 0.006 mM



with the addition of the  $\text{CrO}_x$  overlayer, the P 2p signal is below the detection limit. However, the same phenomenon of ligand removal via heating is expected for these lower concentrations [8,9].

The size of  $\text{Au}_9$  clusters were more stable using the laboratory based XPS instrument comparing to synchrotron XPS. This assumed to be due to ageing of the  $\text{Au}_9$  clusters with the Synchrotron XPS results, where the samples were measured a week after the deposition of  $\text{Au}_9$  and the photodeposition of  $\text{CrO}_x$ [10]. While using the laboratory based XPS instrument, the measurements were performed directly after the deposition of  $\text{Au}_9$  and followed by photodeposition of  $\text{CrO}_x$  layer. The conclusion is similar to that reported previously from synchrotron data that the agglomeration of  $\text{Au}_9$  clusters was inhibited with  $\text{CrO}_x$  layer.

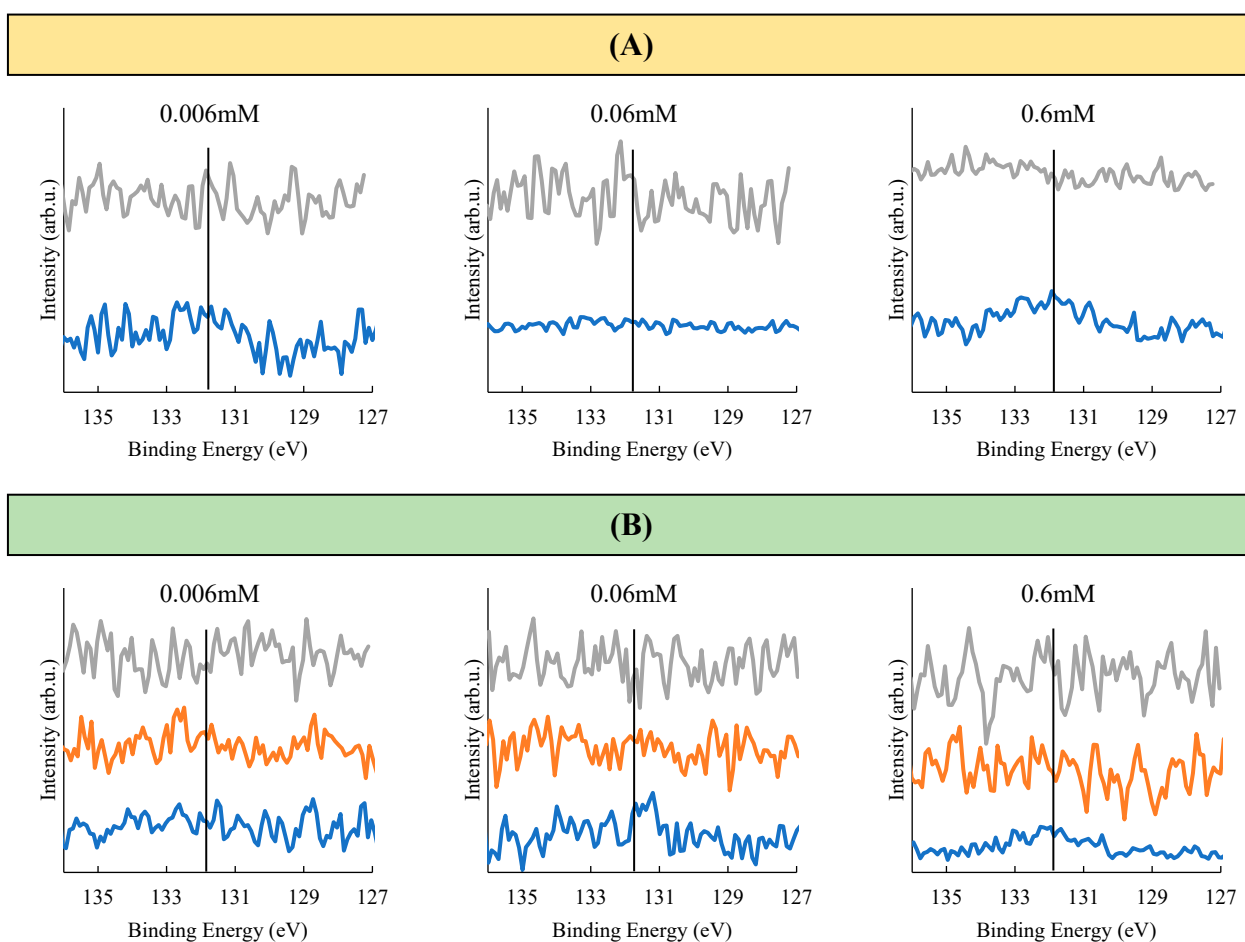

**Figure S8:** XPS spectra of P 2p of (A)  $\text{TiO}_2\text{P-Au}_9$ : after  $\text{Au}_9$  deposition (blue) and after heating (grey) (B)  $\text{TiO}_2\text{P-Au}_9\text{-CrO}_x$ : after  $\text{Au}_9$  deposition (blue), after  $\text{CrO}_x$  layer photodeposited (orange), and after heating (grey)

Figure S9 shows the Cr 2p spectra of TiO<sub>2</sub>P-Au<sub>9</sub> and TiO<sub>2</sub>P-Au<sub>9</sub>-CrO<sub>x</sub>. Before heating, the Cr 2p<sub>3/2</sub> peak is appeared at  $577.7 \pm 0.2$  eV, which relates to the peak position of Cr(OH)<sub>3</sub>[11]. After heating, the Cr 2p<sub>3/2</sub> peak position shifts to a low binding energy at  $577.1 \pm 0.2$  eV, which corresponds to Cr<sub>2</sub>O<sub>3</sub>[12,13]. This confirms that the CrO<sub>x</sub> layer is reduced by heating from Cr(OH)<sub>3</sub> to Cr<sub>2</sub>O<sub>3</sub>. This in agreement to previous studies report that heating reduces Cr(OH)<sub>3</sub> layer to Cr<sub>2</sub>O<sub>3</sub> [14].

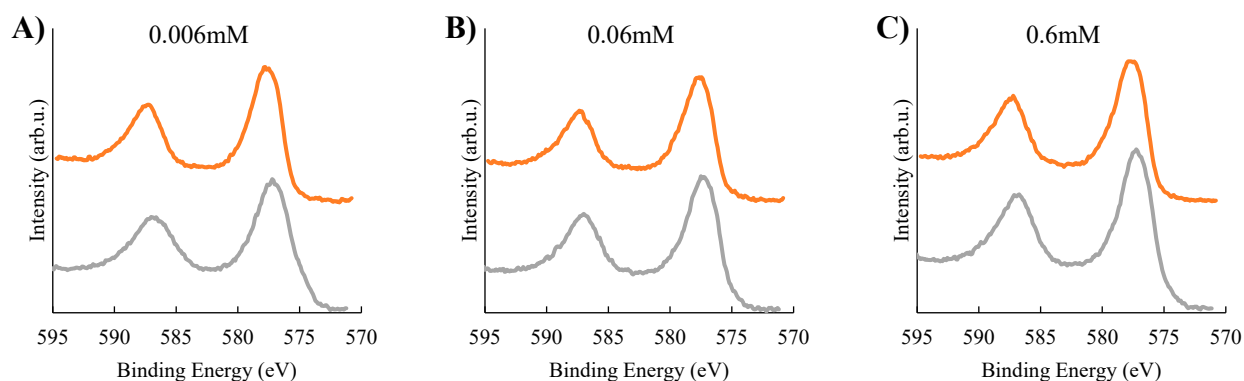

**Figure S9:** XPS spectra of Cr 2p of the TiO<sub>2</sub>P-Au<sub>9</sub>-CrO<sub>x</sub> sample of (A) 0.006mM sample, (B) 0.06mM sample and (C) 0.6mM sample: after CrO<sub>x</sub> layer photodeposited (orange) and after heating (grey).

**Table S3:** XPS Cr 2p<sub>3/2</sub> peak positions and FWHM of TiO<sub>2</sub>P-Au<sub>9</sub>-CrO<sub>x</sub>.

|          | TiO <sub>2</sub> P |               |                    |               |
|----------|--------------------|---------------|--------------------|---------------|
|          | Before heating     |               | After heating      |               |
|          | Peak position (eV) | FWHM          | Peak position (eV) | FWHM          |
| 0.006 mM | $577.7 \pm 0.2$    | $2.7 \pm 0.2$ | $577.1 \pm 0.2$    | $3.4 \pm 0.2$ |
| 0.06 mM  | $577.7 \pm 0.2$    | $2.9 \pm 0.2$ | $577.1 \pm 0.2$    | $3.0 \pm 0.2$ |
| 0.6 mM   | $577.7 \pm 0.2$    | $2.9 \pm 0.2$ | $577.2 \pm 0.2$    | $3.0 \pm 0.2$ |

Figure S10 shows the P 2p spectra of TiO<sub>2</sub>G-Au<sub>9</sub> without and with CrO<sub>x</sub> layer before and after heating. For 0.6 mM, the P 2p<sub>3/2</sub> peak before heating are found at  $131.8 \pm 0.2$  eV for both without and with CrO<sub>x</sub> layer, referring to the peak of PPh<sub>3</sub> ligands[6,7]. After heating, the P 2p<sub>3/2</sub> peak is found at  $133.7 \pm 0.2$  eV, which attribute to removed ligands from the Au<sub>9</sub> clusters and oxidized by attaching to TiO<sub>2</sub> substrate as previously reported[6,9]. For 0.06 and 0.006 mM, the signal of the P 2p is below the detection limit but it is expected that same behavior occurs for these lower concentrations.

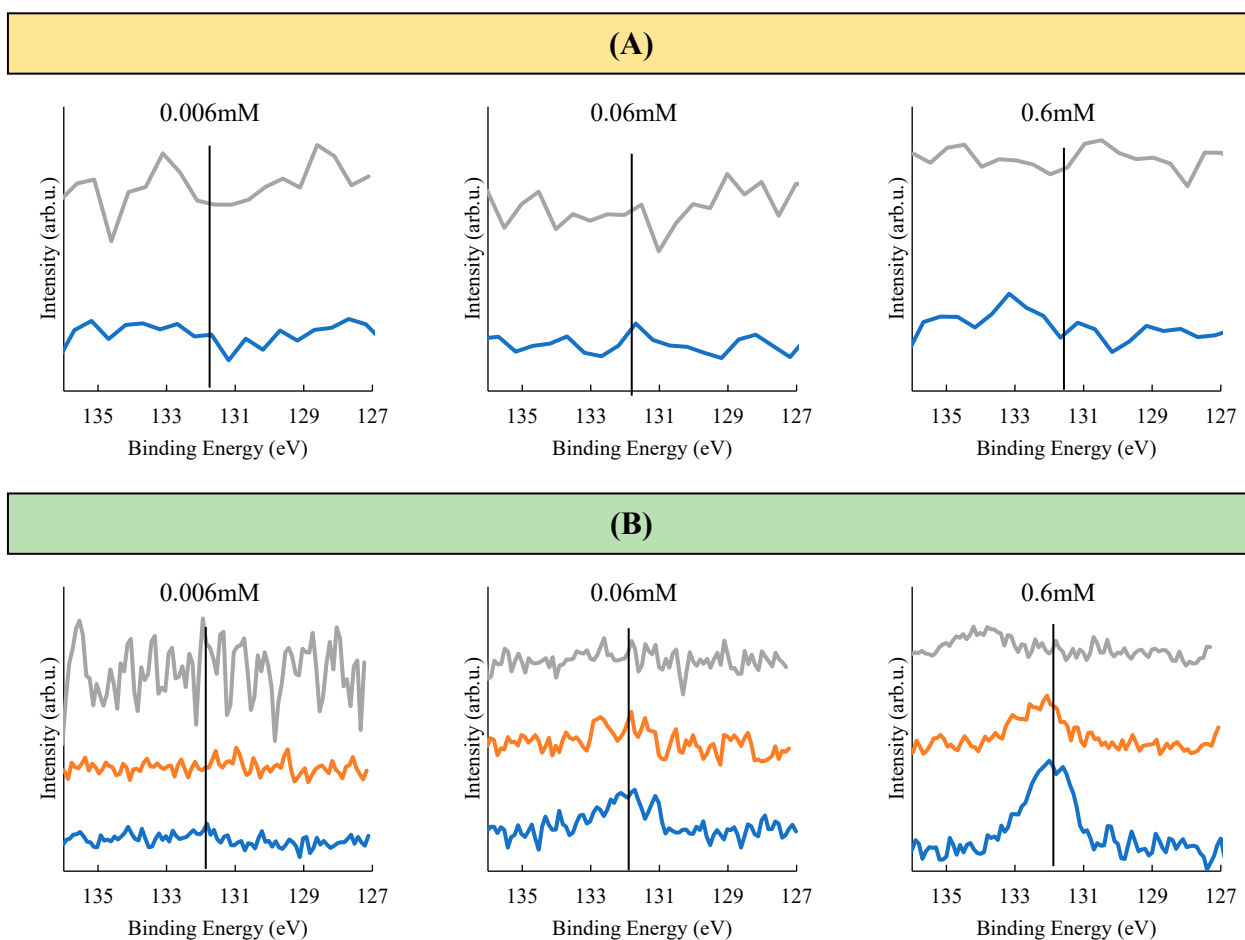

**Figure S10:** XPS spectra of P 2p of (A) TiO<sub>2</sub>G-Au<sub>9</sub>: after Au<sub>9</sub> deposition (blue) and after heating (grey) (B) TiO<sub>2</sub>G-Au<sub>9</sub>-CrO<sub>x</sub>: after Au<sub>9</sub> deposition (blue), after CrO<sub>x</sub> layer photodeposited (orange), and after heating (grey)

Figure S11 shows the Cr 2p spectra of TiO<sub>2</sub>G-Au<sub>9</sub> and TiO<sub>2</sub>G-Au<sub>9</sub>-CrO<sub>x</sub>. The Cr 2p<sub>3/2</sub> peak is appeared at  $577.8 \pm 0.2$  eV before heating for all samples. This binding energy is similar to that of Cr(OH)<sub>3</sub>[11]. The peak position of Cr 2p<sub>3/2</sub> shifts to a low binding energy at  $577.3 \pm 0.2$  eV after

heating, which relates to the binding energy of  $\text{Cr}_2\text{O}_3$  [13]. This is consistent with  $\text{TiO}_2\text{P}$  substrate that  $\text{CrO}_x$  layer is reduced from  $\text{Cr}(\text{OH})_3$  to  $\text{Cr}_2\text{O}_3$  by heating.

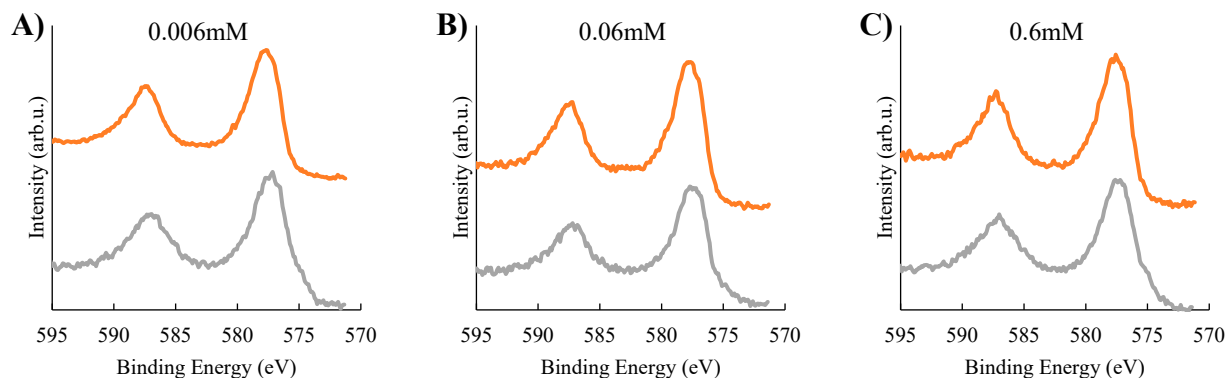

**Figure S11:** XPS spectra of Cr 2p of the  $\text{TiO}_2\text{G-Au}_9\text{-CrO}_x$  sample of (A) 0.006mM sample, (B) 0.06mM sample and (C) 0.6mM sample: after  $\text{CrO}_x$  layer photodeposited (orange) and after heating (grey).

**Table S4:** XPS Cr  $2p_{3/2}$  peak positions and FWHM of  $\text{TiO}_2\text{G-Au}_9\text{-CrO}_x$ .

|          | <b><math>\text{TiO}_2\text{G}</math></b> |               |                    |               |
|----------|------------------------------------------|---------------|--------------------|---------------|
|          | Before heating                           |               | After heating      |               |
|          | Peak position (eV)                       | FWHM          | Peak position (eV) | FWHM          |
| 0.006 mM | $577.8 \pm 0.2$                          | $2.8 \pm 0.2$ | $577.3 \pm 0.2$    | $3.3 \pm 0.2$ |
| 0.06 mM  | $577.8 \pm 0.2$                          | $2.8 \pm 0.2$ | $577.5 \pm 0.2$    | $2.8 \pm 0.2$ |
| 0.6 mM   | $577.6 \pm 0.2$                          | $2.7 \pm 0.2$ | $577.3 \pm 0.2$    | $3.0 \pm 0.2$ |

**Table S5:** XPS relative amount of Cr  $2p_{3/2}$  to Ti  $2p_{3/2}$  of  $\text{TiO}_2\text{P-Au}_9\text{-CrO}_x$  and  $\text{TiO}_2\text{G-Au}_9\text{-CrO}_x$ .

|          | <b>Cr/Ti</b>                                               |               |              |                                                            |               |              |
|----------|------------------------------------------------------------|---------------|--------------|------------------------------------------------------------|---------------|--------------|
|          | <b><math>\text{TiO}_2\text{P-Au}_9\text{-CrO}_x</math></b> |               |              | <b><math>\text{TiO}_2\text{G-Au}_9\text{-CrO}_x</math></b> |               |              |
|          | Before heating                                             | After heating | Difference % | Before heating                                             | After heating | Difference % |
| 0.006 mM | 2.74                                                       | 1.47          | 47           | 1.48                                                       | 0.62          | 58           |
| 0.06 mM  | 1.54                                                       | 1.14          | 26           | 1.30                                                       | 0.40          | 69           |
| 0.6 mM   | 3.12                                                       | 1.99          | 36           | 1.82                                                       | 0.72          | 61           |

## REFERENCES

1. Adnan, R.H.; Madridejos, J.M.L.; Alotabi, A.S.; Metha, G.F.; Andersson, G.G. A Review of State of the Art in Phosphine Ligated Gold Clusters and Application in Catalysis. *Advanced Science* **2022**, *9*, 2105692, doi:<https://doi.org/10.1002/advs.202105692>.
2. Madridejos, J.M.L.; Harada, T.; Falcinella, A.J.; Small, T.D.; Golovko, V.B.; Andersson, G.G.; Metha, G.F.; Kee, T.W. Optical Properties of the Atomically Precise C4 Core [Au9(PPh3)8]3+ Cluster Probed by Transient Absorption Spectroscopy and Time-Dependent Density Functional Theory. *The Journal of Physical Chemistry C* **2021**, *125*, 2033-2044, doi:10.1021/acs.jpcc.0c08838.
3. Mathews, N.R.; Morales, E.R.; Cortés-Jacome, M.A.; Toledo Antonio, J.A. TiO2 Thin Films – Influence of Annealing Temperature on Structural, Optical and Photocatalytic Properties. *Solar Energy* **2009**, *83*, 1499-1508, doi:<https://doi.org/10.1016/j.solener.2009.04.008>.
4. Çörekçi, Ş.; Kizilkaya, K.; Asar, T.; Öztürk, M.; Çakmak, M.; Ozcelik, S. Effects of Thermal Annealing and Film Thickness on the Structural and Morphological Properties of Titanium Dioxide Films. *Acta Physica Polonica A* **2012**, *121*, doi:10.12693/APhysPolA.121.247.
5. Chandra Sekhar, M.; Kondaiah, P.; Jagadeesh Chandra, S.V.; Mohan Rao, G.; Uthanna, S. Substrate temperature influenced physical properties of silicon MOS devices with TiO2 gate dielectric. *Surface and Interface Analysis* **2012**, *44*, 1299-1304, doi:10.1002/sia.5024.
6. Anderson, D.P.; Adnan, R.H.; Alvino, J.F.; Shipper, O.; Donoeva, B.; Ruzicka, J.-Y.; Al Qahtani, H.; Harris, H.H.; Cowie, B.; Aitken, J.B. Gold Clusters Deposited and Activated on Titania. Part II. *Physical chemistry chemical physics* **2013**, *15*, 14806-14813.
7. Anderson, D.P.; Alvino, J.F.; Gentleman, A.; Al Qahtani, H.; Thomsen, L.; Polson, M.I.; Metha, G.F.; Golovko, V.B.; Andersson, G.G. Chemically-Synthesised, Atomically-Precise Gold Clusters Deposited and Activated on Titania. *Physical chemistry chemical physics* **2013**, *15*, 3917-3929.
8. Al Qahtani, H.S.; Metha, G.F.; Walsh, R.B.; Golovko, V.B.; Andersson, G.G.; Nakayama, T. Aggregation Behavior of Ligand-Protected Au9 Clusters on Sputtered Atomic Layer Deposition TiO2. *The Journal of Physical Chemistry C* **2017**, *121*, 10781-10789, doi:10.1021/acs.jpcc.6b11590.
9. Krishnan, G.; Al Qahtani, H.S.; Li, J.; Yin, Y.; Eom, N.; Golovko, V.B.; Metha, G.F.; Andersson, G.G. Investigation of Ligand-Stabilized Gold Clusters on Defect-Rich Titania. *The Journal of Physical Chemistry C* **2017**, *121*, 28007-28016, doi:10.1021/acs.jpcc.7b09514.
10. Wilcoxon, J.P.; Provencio, P. Etching and Aging Effects in Nanosize Au Clusters Investigated Using High-Resolution Size-Exclusion Chromatography. *The Journal of Physical Chemistry B* **2003**, *107*, 12949-12957, doi:10.1021/jp027575y.
11. Moulder, J.F. Handbook of x-ray photoelectron spectroscopy : a reference book of standard data for use in x-ray photoelectron spectroscopy. *Handbook of x-ray photoelectron spectroscopy* : **1992**.
12. Alotabi, A.S.; Gibson, C.T.; Metha, G.F.; Andersson, G.G. Investigation of the Diffusion of Cr2O3 into Different Phases of TiO2 upon Annealing. *ACS Applied Energy Materials* **2021**, *4*, 322-330, doi:10.1021/acsaem.0c02270.
13. Biesinger, M.C.; Brown, C.; Mycroft, J.R.; Davidson, R.D.; McIntyre, N.S. X-ray photoelectron spectroscopy studies of chromium compounds. *Surface and Interface Analysis* **2004**, *36*, 1550-1563, doi:10.1002/sia.1983.
14. Kawawaki, T.; Kataoka, Y.; Hirata, M.; Akinaga, Y.; Takahata, R.; Wakamatsu, K.; Fujiki, Y.; Kataoka, M.; Kikkawa, S.; Alotabi, A.S.; et al. Creation of High-Performance Heterogeneous Photocatalysts by Controlling Ligand Desorption and Particle Size of Gold Nanocluster. *Angewandte Chemie International Edition* **2021**, *60*, 21340-21350, doi:<https://doi.org/10.1002/anie.202104911>.
